# Supplementary material
Source: ML conference proceedings conference paper supplement (https://openaccess.thecvf.com/content/ICCV2023/html/Kang_Alleviating_Catastrophic_Forgetting_ICCV_2023_paper.html)
Supplement: Supplementary file 1 [file Kang_Alleviating_Catastrophic_Forgetting_ICCV_2023_supplemental.pdf]

# Appendix

## 9. More details about our methods

### 9.1. Distance Matrix Distillation (DMD)

Distance Matrix Distillation (DMD) is proposed to maintain the class-level between-class discriminativeness. Since teacher has already learned a high-quality discrete semantic space, student can learn to be distinct by directly learning from the discrete semantic space of teacher. Moreover, the high-level semantic difference is accumulated by low-level feature difference throughout forward-propagation and back-propagation of neural networks. Thus, in order to keep the difference, we focus on the interaction between both the useful low-level feature difference and the useful high-level semantic difference to better ensure its discriminativeness.

We provide a detailed description of DMD method as illustrated in Algorithm 1. Specifically, for each class  $i$ , we first calculate the average high-level semantic feature  $\bar{Q}_{class_i}^T$  for teacher and  $\bar{Q}_{class_i}^S$  for student. We also calculate the average low-level detail feature  $\bar{F}_{class_i}^T$  for teacher and  $\bar{F}_{class_i}^S$  for student. Then, we calculate four distance matrices  $FMat^T$ ,  $FMat^S$ ,  $SMat^T$  and  $SMat^S$  between each two categories  $i$  and  $j$ . We finally calculate DMD loss  $L_{DMD}$  as an interaction between the semantic difference ( $SMat^S - SMat^T$ ) and feature difference ( $FMat^S - FMat^T$ ).

### 9.2. Interactive Feature Distillation (IFD)

We provide a detailed description of IFD method as illustrated in Algorithm 2. First, for each instance  $n$ , we calculate (a) its high-level semantic difference  $Q_{diffn}$  between student and teacher, and (b) low-level detail difference  $F_{diffn}$  between student and teacher. Based on these two differences, we calculate the interactive difference  $IF_{diffn}$  for each instance. Then, average interactive difference  $\bar{IF}_{diffi}$  is calculated as the average of all interactive difference  $IF_{diffn}$  within category  $i$ . The total interactive loss  $L_{IFD}$  is calculated as the sum of all average interactive difference  $\bar{IF}_{diffi}$ .

## 10. More results on IOD task

### 10.1. One-step results

As discussed in paper, Appendix Table 10 indicates 2-step performance of VOC under 10+10, 15+5, 19+1 scenarios. We compare our method with all other methods, including

- other knowledge distillation methods  
SID [31], ILOD [38], Faster ILOD [30], RILOD [21],

---

### Algorithm 1 Distance Matrix Distillation (DMD)

---

**Input:** Image  $I$ , teacher detector  $\theta^T$ , student detector  $\theta^S$ , all old categories  $Labels_{old}$ .

**Output:** Class-level between-class loss function  $L_{DMD}$ .

```
1: Inference  $I$  with teacher detector  $\theta^T$  yields potential instances. Each instance  $n$  includes low-level detail feature  $F_n^T$ , high-level semantic feature  $Q_n^T$ , and classification predictions  $C_n^T$ .
2: Inference  $I$  with student detector  $\theta^S$  yields potential instances. Each instance  $n$  includes low-level detail feature  $F_n^S$ , high-level semantic feature  $Q_n^S$ , and classification predictions  $C_n^S$ .
3:
4: // Calculating high-level semantic feature and low-level detail feature for each category.
5: for  $i$  in  $Labels_{old}$  do
6:   for all  $C_n^T = i$  do
7:     // for teacher model
8:     Compute  $APF_n^T = AdaptivePooling(F_n^T)$ 
9:     // for student model
10:    Compute  $APF_n^S = AdaptivePooling(F_n^S)$ 
11:   end for
12:   Compute  $\bar{F}_{class_i}^T = mean(APF_n^T)$ 
13:   Compute  $\bar{Q}_{class_i}^T = mean(Q_n^T)$ 
14:   Compute  $\bar{F}_{class_i}^S = mean(APF_n^S)$ 
15:   Compute  $\bar{Q}_{class_i}^S = mean(Q_n^S)$ 
16: end for
17:
18: // Calculating distance matrix among each two categories  $i$  and  $j$ 
19: Create  $FMat^T, FMat^S, SMat^T, SMat^S$ 
20: for  $i$  in  $Labels_{old}$  do
21:   for  $j$  in  $Labels_{old}$  do
22:     // for teacher model
23:     Compute  $FMat_{i,j}^T = (\bar{F}_{class_i}^T - \bar{F}_{class_j}^T)^2$ 
24:     Compute  $SMat_{i,j}^T = (\bar{Q}_{class_i}^T - \bar{Q}_{class_j}^T)^2$ 
25:     // for student model
26:     Compute  $FMat_{i,j}^S = (\bar{F}_{class_i}^S - \bar{F}_{class_j}^S)^2$ 
27:     Compute  $SMat_{i,j}^S = (\bar{Q}_{class_i}^S - \bar{Q}_{class_j}^S)^2$ 
28:   end for
29: end for
30:
31: // Calculating DMD loss
32: Compute  $L_{DMD} = (SMat^S - SMat^T) \times (FMat^S - FMat^T)$ 
33:
34: return  $L_{DMD}$ 
```

---

---

**Algorithm 2** Interactive Feature Distillation (IFD)

---

**Input:** Image  $I$ , teacher detector  $\theta^T$ , student detector  $\theta^S$ , all old categories  $Labels_{old}$ .

**Output:** Instance-level within-class loss function  $L_{IFD}$ .

```
1:  $\overline{IF}_{diff_i} = 0$ 
2:  $L_{IFD} = 0$ 
3: Inference  $I$  with teacher detector  $\theta^T$  yields potential instances. Each instance  $n$  includes low-level detail feature  $F_n^T$ , high-level semantic feature  $Q_n^T$ , and classification predictions  $C_n^T$ .
4: Inference  $I$  with student detector  $\theta^S$  yields potential instances. Each instance  $n$  includes low-level detail feature  $F_n^S$ , high-level semantic feature  $Q_n^S$ , and classification predictions  $C_n^S$ .
5:
6: // Calculating interactive feature  $IF_{diff_n}$  for each instance, and averaging as  $\overline{IF}_{diff_i}$  for each category.
7: for  $i$  in  $Labels_{old}$  do
8:   for all  $C_n^T = i$  do
9:     Compute  $APF_n^S = AdaptivePooling(F_n^S)$ 
10:    Compute  $APF_n^T = AdaptivePooling(F_n^T)$ 
11:    Compute  $F_{diff_n} = |F_n^S - F_n^T|$ 
12:    Compute  $Q_{diff_n} = |Q_n^S - Q_n^T|$ 
13:    Compute  $IF_{diff_n} = F_{diff_n} \times Q_{diff_n}$ 
14:   end for
15:   Compute  $\overline{IF}_{diff_i} = mean(IF_{diff_n})$ 
16: end for
17:
18: // Calculating total interactive loss
19: for  $i$  in  $Labels_{old}$  do
20:   Compute  $L_{IFD} = L_{IFD} + \overline{IF}_{diff_i}$ 
21: end for
22:
23: return  $L_{IFD}$ 
```

---

MMA[1], Meta-ILOD[17], DMC[51], Topology[47], MVCD[45].

- replay methods

Meta-ILOD[17], ORE[16], OW-DETR[11].

- methods including external data

RILOD[21], DMC[51].

- methods including pseudo-labels

ORE[16], Topology[47], OW-DETR[11], IncDet[27].

- EWC-related methods

IncDet[27].

- meta-learning methods

Meta-ILOD[17].

All these methods are listed in Appendix Table 8 for much more comparison and insights. The incremental learning results in Appendix Table 10 demonstrate that our method is highly competitive.

## 10.2. Multi-step results

As mentioned in paper, we provide 4-step COCO results in Appendix Table 9, 5-step VOC in Appendix Table 11 and 3-step COCO+VOC results in Appendix Table 7.

Specifically, Appendix Table 9 shows the incremental learning results on COCO dataset under 40+10+10+10+10 setting. Our method has better AbsGap, RelGap and  $\Omega$  values than other knowledge distillation methods at each incremental step. It demonstrates the ability of alleviating long-term catastrophic forgetting.

Moreover, Appendix Table 11 shows the VOC incremental learning results step-by-step under 15+1+1+1+1 setting. The performance of our method exceeds SID [31], the most typical knowledge distillation method. It also helps prove the effectiveness of our method on long-term catastrophic forgetting.

In addition, Appendix Table 7 provides 20+20+20+20 three-step scenario that using a combination of VOC and COCO datasets. We use the exact same dataset provided in [16, 47, 11]. The dataset includes all VOC classes as the first 20-class normal training, and the remaining 60 classes from COCO are grouped into three incremental steps with semantic drifts. The results show that our method has better performances even than ORE [16], Topology [47] and OW-DETR [11], the three methods are designed for open-world object detection task and include extra replay samples.

## 10.3. Stability and Plasticity

For incremental learning, it is very important to balance the stability on old knowledge and the plasticity on new knowledge. Here we also employ evaluation metrics of RSD, RPD and RPSD [29] to discuss stability and plasticity of incremental detectors. Specifically, RSD and RPD [29], defined in Eq. 11 and Eq. 12 refer to the rate of stability deficits on old categories and the rate of plasticity deficits on new categories. RPSD [29], defined in Eq. 13, represents the balancing performance between stability and plasticity.

$$RSD = \frac{1}{N_{old}} \sum_{t=1}^{N_{old}} \frac{mAP_{upper,t} - mAP_{final,t}}{mAP_{upper,t}} \quad (11)$$

$$RPD = \frac{1}{N_{new}} \sum_{t=N_{old}+1}^{N_{old}+N_{new}} \frac{mAP_{upper,t} - mAP_{final,t}}{mAP_{upper,t}} \quad (12)$$

$$RPSD = RSD + RPD \quad (13)$$

where  $t$  refers to  $t^{th}$  task in incremental learning.  $mAP_{final,t}$  and  $mAP_{upper,t}$  refer to the task-average mAP

Table 6. Incremental results (%) with AdaMixer architecture on COCO benchmark under different scenarios. AbsGap and RelGap represent the absolute gap and the relative gap toward upper bound.  $\Omega$  value represents the incremental capability. We here use ResNet50 as its backbone, and use PVT2[42] in Table 5(5) as its backbone.

| Scenarios               | Method    | AbsGap      | RelGap↓       | $\Omega_{all}$ ↑ | $\Omega_{50}$ ↑ | $\Omega_{75}$ ↑ | $\Omega_S$ ↑ | $\Omega_M$ ↑ | $\Omega_L$ ↑ |
|-------------------------|-----------|-------------|---------------|------------------|-----------------|-----------------|--------------|--------------|--------------|
| 40 classes + 40 classes | LwF[24]   | 23.00       | 57.21%        | 0.714            | 0.718           | 0.713           | 0.670        | 0.709        | 0.733        |
|                         | RILOD[21] | 10.30       | 25.62%        | 0.872            | 0.886           | 0.867           | 0.841        | 0.874        | 0.888        |
|                         | SID[31]   | 6.20        | 15.42%        | 0.923            | 0.941           | 0.916           | 0.897        | 0.935        | 0.930        |
|                         | ERD[9]    | 3.30        | 8.21%         | 0.959            | 0.967           | 0.954           | 0.959        | 0.958        | 0.955        |
|                         | Ours      | <b>2.58</b> | <b>6.78%</b>  | <b>0.966</b>     | <b>0.971</b>    | <b>0.968</b>    | <b>0.961</b> | <b>0.966</b> | <b>0.969</b> |
| 50 classes + 30 classes | LwF[24]   | 35.20       | 87.56%        | 0.562            | 0.581           | 0.553           | 0.608        | 0.576        | 0.555        |
|                         | RILOD[21] | 11.70       | 29.10%        | 0.854            | 0.870           | 0.846           | 0.832        | 0.858        | 0.864        |
|                         | SID[31]   | 6.40        | 15.92%        | 0.920            | 0.937           | 0.914           | 0.879        | 0.932        | 0.932        |
|                         | ERD[9]    | 3.60        | 8.96%         | 0.955            | 0.963           | 0.946           | 0.918        | 0.958        | 0.960        |
|                         | Ours      | <b>2.16</b> | <b>5.68%</b>  | <b>0.972</b>     | <b>0.973</b>    | <b>0.973</b>    | <b>0.976</b> | <b>0.978</b> | <b>0.971</b> |
| 60 classes + 20 classes | LwF[24]   | 34.40       | 85.57%        | 0.572            | 0.593           | 0.561           | 0.586        | 0.596        | 0.574        |
|                         | RILOD[21] | 14.80       | 36.82%        | 0.816            | 0.833           | 0.807           | 0.800        | 0.829        | 0.823        |
|                         | SID[31]   | 7.50        | 18.66%        | 0.907            | 0.927           | 0.897           | 0.871        | 0.926        | 0.917        |
|                         | ERD[9]    | 4.40        | 10.95%        | 0.945            | 0.954           | 0.940           | 0.944        | 0.947        | 0.945        |
|                         | Ours      | <b>3.38</b> | <b>8.89%</b>  | <b>0.956</b>     | <b>0.964</b>    | <b>0.952</b>    | <b>0.955</b> | <b>0.959</b> | <b>0.953</b> |
| 70 classes + 10 classes | LwF[24]   | 33.10       | 82.34%        | 0.588            | 0.606           | 0.580           | 0.603        | 0.608        | 0.596        |
|                         | RILOD[21] | 15.70       | 39.05%        | 0.805            | 0.825           | 0.795           | 0.806        | 0.811        | 0.821        |
|                         | SID[31]   | 7.40        | 18.41%        | 0.908            | 0.920           | 0.901           | 0.869        | 0.918        | 0.926        |
|                         | ERD[9]    | 5.30        | 13.18%        | 0.934            | 0.945           | 0.929           | 0.903        | 0.940        | 0.936        |
|                         | Ours      | <b>4.27</b> | <b>11.24%</b> | <b>0.944</b>     | <b>0.955</b>    | <b>0.935</b>    | <b>0.914</b> | <b>0.946</b> | <b>0.939</b> |

and upper-bound mAP on all testing data containing learned categories after task  $t$ , respectively.  $N_{old}$  and  $N_{new}$  refer to the total number of old categories and new categories. The smaller the RPSD is, the better the total performance of stability and plasticity would be.

As shown in Appendix Table 10, our method has the smallest AbsGap of 2.23 and RelGap of 3.15%, largest  $\Omega$  of 0.9842 under 10+10 scenarios, indicating its excellent incremental learning ability. Our method also has smallest RSPD of 6.27, RSD of 5.97 and RPD of 0.30, indicating its best trade-off ability between stability and plasticity to achieve an optimal comprehensive performance. Similar results are shown under 15+5 scenarios and 19+1 scenarios, which further support the effectiveness of our method.

In addition, Appendix Table 10 shows that the RPSD reflects a strong correlation with the final incremental learning performance. To better illustrate their relations, we plot the curves between RSD, RPD, RPSD and RelGap in Fig. 6. Obviously, these remarkable results once again reveal that the balance between stability of old knowledge and plasticity of new knowledge is crucial to incremental learning.

Compared with most of these methods, our method performs better on both RSD and RPD, therefore leading to better comprehensive performance on RPSD.

## 11. Further Discussion

In order to preserve the within-class consistency, semantic information for the same category should be forced to remain close-by. [47, 49] calculate a static semantic centroid for each category with pretrain models, like Bert [5] and CLIP [33], and make every instance within that category close to the static semantic centroid. Since these pre-trained models have rich class-level semantic information, it can provide a discrete and static semantic centroid for each category and thus support a discrete semantic feature space. However, it utilizes prior knowledge of the pre-trained model, which is not usually provided. Moreover, the semantic space should not be fixed due to its access to different datasets. Therefore, we discard the static semantic centroid method and propose to use dynamic semantic centroids generated by teacher. Since teacher has already learned a high-quality semantic space, student can learn the

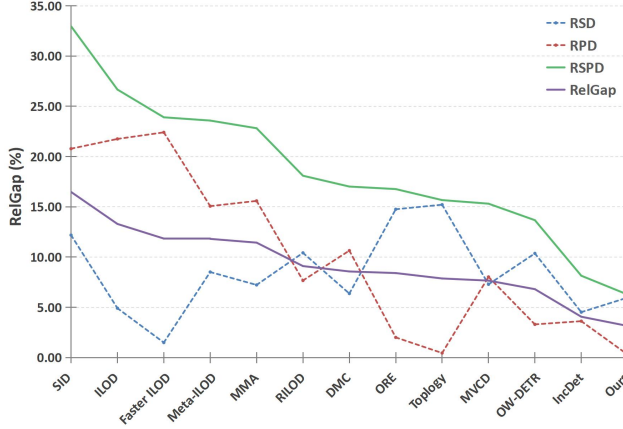

(a) Stability and Plasticity on VOC(10+10)

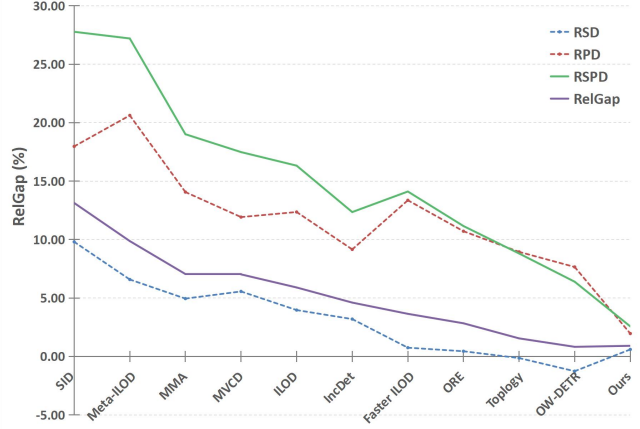

(b) Stability and Plasticity on VOC(15+5)

Figure 6. Incremental learning performance (RelGap), the stability deficits rate (RSD) of old knowledge, the plasticity deficits rate (RPD) of new knowledge and their total deficits rate (RSPD). (a) results on VOC(10+10). (b) results on VOC(15+5). In both (a) and (b), the incremental learning performance (RelGap) reflects a positive correlation with RSPD. Some previous methods [38, 30, 17, 16, 47, 11] have contrary performance of stability and plasticity on VOC(10+10). They sacrifice one in exchange for the promotion of the other. All methods have consistent performance on VOC(15+5), in which sacrificing the latter has the least impact on final performance. Obviously, our methods achieve state-of-art or very competitive performance by making better trade-off between old and new knowledge.

Table 7. Incremental learning results under VOC+COCO 20+20+20+20 three-step scenario. VOC+COCO refers to the dataset setting of OWO task proposed by ORE [16]. It combines Pascal VOC [8] and MS COCO [3] together. The first subset consists of 20 categories from Pascal VOC, and other subsets consist of remained 60 categories from MS COCO, which are split by semantic drifts. The colored mAP values of classes(1-20), classes(1-40) and classes(1-60) denote the performance of previously learned classes.

| Method       | mAP     |           |           |           | AbsGap↓      | RelGap↓       | $\Omega_{all} \uparrow$ | Final mAP | Upper Bound |
|--------------|---------|-----------|-----------|-----------|--------------|---------------|-------------------------|-----------|-------------|
|              | A(1-20) | +B(20-40) | +B(40-60) | +B(60-80) |              |               |                         |           |             |
| ORE [16]     | 56.34   |           |           |           | 0.00         | 0.00%         | 1.0000                  | 56.34     | 56.34       |
|              | 52.37   | 25.58     |           |           | 11.13        | 22.21%        | 0.8889                  | 38.98     | 50.11       |
|              |         | 37.77     | 12.41     |           | 15.91        | 35.18%        | 0.8087                  | 29.32     | 45.23       |
|              |         |           | 30.01     | 13.44     | 16.23        | 37.84%        | 0.7619                  | 26.66     | 42.89       |
| Toplogy [47] | 56.34   |           |           |           | 0.00         | 0.00%         | 1.0000                  | 56.34     | 56.34       |
|              | 53.39   | 26.49     |           |           | 10.17        | 20.30%        | 0.8985                  | 39.94     | 50.11       |
|              |         | 38.04     | 12.81     |           | 15.60        | 34.49%        | 0.8174                  | 29.63     | 45.23       |
|              |         |           | 30.11     | 13.31     | 16.98        | 39.59%        | 0.7641                  | 25.91     | 42.89       |
| OW-DETR [11] | 56.34   |           |           |           | 0.00         | 0.00%         | 1.0000                  | 56.34     | 56.34       |
|              | 53.55   | 33.45     |           |           | 7.19         | 14.35%        | 0.9283                  | 42.92     | 50.11       |
|              |         | 38.25     | 15.82     |           | 14.46        | 31.97%        | 0.8456                  | 30.77     | 45.23       |
|              |         |           | 31.38     | 17.14     | 15.07        | 35.14%        | 0.7964                  | 27.82     | 42.89       |
| Ours         | 55.32   |           |           |           | 0.00         | 0.00%         | 1.0000                  | 55.32     | 55.32       |
|              | 49.16   | 38.67     |           |           | 3.90         | 8.15%         | 0.9592                  | 43.91     | 48.33       |
|              |         | 35.13     | 32.63     |           | 9.20         | 21.14%        | 0.9023                  | 34.30     | 44.03       |
|              |         |           | 31.04     | 24.91     | <b>11.66</b> | <b>28.32%</b> | <b>0.8560</b>           | 29.51     | 42.73       |

semantic centroids and the entire semantic space by directly learning from its perfect teacher.

Table 8. Main methods and base detectors for class-incremental object detection task in recent years.

| Method           | Method Type                                                | Base Detector                         |
|------------------|------------------------------------------------------------|---------------------------------------|
| LwF [24]         | Pseudo-Labels                                              | Faster-RCNN [36]                      |
| SID [31]         | Knowledge Distillation                                     | CenterNet [7], FCOS [39]              |
| ILOD [38]        | Knowledge Distillation                                     | Faster-RCNN [36]                      |
| RILOD [21]       | Knowledge Distillation<br>External Data                    | RetinaNet [25]                        |
| Faster ILOD [30] | Knowledge Distillation                                     | Faster-RCNN [36]                      |
| Meta-ILOD [17]   | Knowledge Distillation<br>Meta-Learning<br>Exemplar Replay | Faster-RCNN [36]                      |
| RD-IOD [46]      | Knowledge Distillation                                     | Faster-RCNN [36]                      |
| CIFRCN [12]      | Knowledge Distillation                                     | Faster-RCNN [36]                      |
| MVCD [45]        | Knowledge Distillation                                     | Faster-RCNN [36]                      |
| MMA [1]          | Knowledge Distillation                                     | Faster-RCNN [36]                      |
| DMC [51]         | Knowledge Distillation<br>External Data                    | RetinaNet [25]                        |
| ORE [16]         | Pseudo-Labels<br>Exemplar Replay                           | Faster-RCNN [36]                      |
| Topology [47]    | Knowledge Distillation<br>Exemplar Replay                  | Faster-RCNN [36]                      |
| OW-DETR [11]     | Pseudo-Labels<br>Exemplar Replay                           | DETR                                  |
| IncDet [27]      | Pseudo-Labels<br>EWC                                       | Faster-RCNN [36]                      |
| ERD [9]          | Knowledge Distillation                                     | GFL v1 [23]                           |
| Ours             | Knowledge Distillation                                     | Deformable DETR [52]<br>AdaMixer [10] |

Table 9. Incremental results (%) on COCO benchmark under the 40+10+10+10+10 four-step setting.

|            | A(1-40)   |              |               |                  |             |
|------------|-----------|--------------|---------------|------------------|-------------|
|            | +B(40-50) |              |               |                  |             |
|            | mAP       | AbsGap       | RelGap↓       | $\Omega_{all}$ ↑ | Upper Bound |
| CF         | 5.80      | 32.20        | 84.74%        | 0.576            | 38.00       |
| RILOD [21] | 25.40     | 12.60        | 33.16%        | 0.834            | 38.00       |
| SID [31]   | 34.60     | 3.40         | 8.95%         | 0.955            | 38.00       |
| ERD [9]    | 36.40     | 1.60         | 4.21%         | 0.979            | 38.00       |
| Ours       | 39.10     | <b>1.10</b>  | <b>2.81%</b>  | <b>0.986</b>     | 40.20       |
|            | +B(50-60) |              |               |                  |             |
|            | mAP       | AbsGap       | RelGap↓       | $\Omega_{all}$ ↑ | Upper Bound |
| CF         | 5.70      | 34.10        | 85.68%        | 0.432            | 39.80       |
| RILOD [21] | 11.20     | 28.60        | 71.86%        | 0.650            | 39.80       |
| SID [31]   | 24.10     | 15.70        | 39.45%        | 0.839            | 39.80       |
| ERD [9]    | 30.80     | 9.00         | 22.61%        | 0.911            | 39.80       |
| Ours       | 35.40     | <b>4.50</b>  | <b>12.71%</b> | <b>0.953</b>     | 39.90       |
|            | +B(60-70) |              |               |                  |             |
|            | mAP       | AbsGap       | RelGap↓       | $\Omega_{all}$ ↑ | Upper Bound |
| CF         | 6.30      | 29.40        | 82.35%        | 0.368            | 35.70       |
| RILOD [21] | 10.50     | 25.20        | 70.59%        | 0.561            | 35.70       |
| SID [31]   | 14.60     | 21.10        | 59.10%        | 0.731            | 35.70       |
| ERD [9]    | 26.20     | 9.50         | 26.61%        | 0.866            | 35.70       |
| Ours       | 32.00     | <b>7.80</b>  | <b>24.38%</b> | <b>0.916</b>     | 39.80       |
|            | +B(70-80) |              |               |                  |             |
|            | mAP       | AbsGap       | RelGap↓       | $\Omega_{all}$ ↑ | Upper Bound |
| CF         | 3.30      | 36.90        | 91.79%        | 0.311            | 40.20       |
| RILOD [21] | 8.40      | 31.80        | 79.10%        | 0.491            | 40.20       |
| SID [31]   | 12.60     | 27.60        | 68.66%        | 0.648            | 40.20       |
| ERD [9]    | 20.70     | 19.50        | 48.51%        | 0.796            | 40.20       |
| Ours       | 30.30     | <b>10.00</b> | <b>33.00%</b> | <b>0.883</b>     | 40.30       |

Table 10. Incremental results (%) on VOC benchmark under different scenarios.

| Scenarios                  | Method           | AbsGap       | RelGap        | $\Omega$      | RSPD        | RSD          | RPD         | Final mAP |       |       | Upper Bound |       |       |
|----------------------------|------------------|--------------|---------------|---------------|-------------|--------------|-------------|-----------|-------|-------|-------------|-------|-------|
|                            |                  |              |               |               |             |              |             | Total     | Old   | New   | Total       | Old   | New   |
| 10 classes<br>+ 10 classes | SID [31]         | 22.30        | 33.99%        | 0.8300        | 67.95       | 34.59        | 33.35       | 43.30     | 44.36 | 42.24 | 65.60       | 67.82 | 63.38 |
|                            | ILOD [38]        | 9.38         | 13.30%        | 0.9335        | 26.67       | 4.91         | 21.75       | 61.14     | 67.34 | 54.93 | 70.51       | 70.82 | 70.20 |
|                            | Faster ILOD [30] | 8.35         | 11.84%        | 0.9408        | 23.90       | 1.50         | 22.41       | 62.16     | 69.76 | 54.47 | 70.51       | 70.82 | 70.20 |
|                            | Meta-ILOD [17]   | 8.88         | 11.81%        | 0.9409        | 23.58       | 8.51         | 15.07       | 66.31     | 68.36 | 64.26 | 75.19       | 74.72 | 75.66 |
|                            | MMA [1]          | 8.60         | 11.44%        | 0.9428        | 22.82       | 7.23         | 15.59       | 66.60     | 69.3  | 63.9  | 75.20       | 74.70 | 75.70 |
|                            | RILOD [21]       | 6.80         | 9.10%         | 0.9545        | 18.09       | 10.42        | 7.67        | 67.90     | 67.48 | 68.36 | 74.70       | 75.33 | 74.04 |
|                            | DMC [51]         | 6.40         | 8.57%         | 0.9572        | 17.01       | 6.37         | 10.64       | 68.30     | 70.53 | 66.16 | 74.70       | 75.33 | 74.04 |
|                            | ORE [16]         | 5.93         | 8.41%         | 0.9579        | 16.76       | 14.76        | 2.01        | 64.58     | 60.37 | 68.79 | 70.51       | 70.82 | 70.20 |
|                            | Topology [47]    | 5.55         | 7.87%         | 0.9606        | 15.67       | 15.21        | 0.46        | 64.96     | 60.03 | 69.88 | 70.51       | 70.80 | 70.20 |
|                            | MVCD [45]        | 5.48         | 7.66%         | 0.9617        | 15.31       | 7.29         | 8.02        | 66.09     | 66.15 | 66.02 | 71.57       | 71.35 | 71.78 |
|                            | OW-DETR [11]     | 4.80         | 6.81%         | 0.9660        | 13.67       | 10.36        | 3.30        | 65.71     | 63.48 | 67.88 | 70.51       | 70.82 | 70.20 |
|                            | IncDet [27]      | 3.00         | 4.07%         | 0.9797        | 8.14        | 4.52         | 3.62        | 70.80     | 69.70 | 71.80 | 73.80       | 73.00 | 74.50 |
| Ours                       | <b>2.23</b>      | <b>3.15%</b> | <b>0.9842</b> | <b>6.27</b>   | <b>5.97</b> | <b>0.30</b>  | 68.56       | 67.01     | 70.11 | 70.79 | 71.26       | 70.32 |       |
| 15 classes<br>+ 5 classes  | SID [31]         | 13.70        | 20.88%        | 0.8956        | 41.35       | 24.49        | 16.86       | 51.90     | 52.26 | 51.54 | 65.60       | 69.21 | 61.99 |
|                            | Meta-ILOD [17]   | 7.42         | 9.87%         | 0.9507        | 27.20       | 6.58         | 20.62       | 67.77     | 71.73 | 55.90 | 75.19       | 76.78 | 70.42 |
|                            | MMA [1]          | 5.30         | 7.05%         | 0.9648        | 19.01       | 4.95         | 14.06       | 69.90     | 73.00 | 60.50 | 75.20       | 76.80 | 70.40 |
|                            | MVCD [45]        | 5.02         | 7.02%         | 0.9649        | 17.48       | 5.56         | 11.92       | 66.54     | 69.41 | 57.92 | 71.57       | 73.50 | 65.76 |
|                            | ILOD [38]        | 4.16         | 5.90%         | 0.9705        | 16.32       | 3.97         | 12.36       | 66.35     | 69.25 | 57.60 | 70.51       | 72.11 | 65.72 |
|                            | IncDet [27]      | 3.40         | 4.61%         | 0.9770        | 12.35       | 3.20         | 9.16        | 70.40     | 72.70 | 63.50 | 73.80       | 75.10 | 69.90 |
|                            | Faster ILOD [30] | 2.57         | 3.64%         | 0.9818        | 14.11       | 0.75         | 13.36       | 67.94     | 71.57 | 56.94 | 70.51       | 72.11 | 65.72 |
|                            | ORE [16]         | 2.00         | 2.84%         | 0.9858        | 11.16       | 0.44         | 10.71       | 68.51     | 71.79 | 58.68 | 70.51       | 72.11 | 65.72 |
|                            | OW-DETR [11]     | 1.09         | 1.55%         | 0.9923        | 8.81        | -0.14        | 8.95        | 69.42     | 72.21 | 59.84 | 70.51       | 72.11 | 65.72 |
|                            | Topology [47]    | 0.58         | 0.82%         | 0.9959        | 6.39        | -1.26        | 7.65        | 69.93     | 73.01 | 60.69 | 70.51       | 72.10 | 65.72 |
|                            | Ours             | <b>0.64</b>  | <b>0.91%</b>  | <b>0.9955</b> | <b>2.57</b> | <b>0.60</b>  | <b>1.96</b> | 70.15     | 71.55 | 65.88 | 70.79       | 71.99 | 67.20 |
| 19 classes<br>+ 1 classes  | SID [31]         | 20.10        | 30.64%        | 0.8468        | 60.82       | 33.82        | 27.00       | 45.50     | 46.33 | 44.67 | 65.60       | 70.01 | 61.19 |
|                            | RILOD [21]       | 9.70         | 12.99%        | 0.9351        | 59.60       | 10.93        | 48.67       | 65.00     | 66.33 | 40.40 | 74.70       | 74.47 | 78.70 |
|                            | Meta-ILOD [17]   | 4.97         | 6.60%         | 0.9670        | 27.56       | 5.82         | 21.74       | 70.23     | 70.89 | 57.60 | 75.19       | 75.27 | 73.60 |
|                            | DMC [51]         | 3.90         | 5.21%         | 0.9739        | 17.12       | 4.80         | 12.33       | 70.81     | 70.90 | 69.00 | 74.70       | 74.47 | 78.70 |
|                            | MMA [1]          | 4.50         | 5.98%         | 0.9701        | 19.44       | 5.58         | 13.86       | 70.70     | 71.10 | 63.40 | 75.20       | 75.30 | 73.60 |
|                            | ILOD [38]        | 2.79         | 3.96%         | 0.9802        | 11.37       | 3.97         | 7.40        | 67.72     | 67.72 | 65.10 | 70.51       | 70.52 | 70.30 |
|                            | Faster ILOD [30] | 1.95         | 2.77%         | 0.9862        | 15.37       | 2.28         | 13.09       | 68.56     | 68.91 | 61.10 | 70.51       | 70.52 | 70.30 |
|                            | MVCD [45]        | 1.86         | 2.59%         | 0.9870        | 14.28       | 2.11         | 12.17       | 69.71     | 70.19 | 60.60 | 71.57       | 71.70 | 69.00 |
|                            | ORE [16]         | 1.62         | 2.30%         | 0.9885        | 16.17       | 1.66         | 14.51       | 68.89     | 69.35 | 60.10 | 70.51       | 70.52 | 70.30 |
|                            | Topology [47]    | 0.69         | 0.98%         | 0.9951        | 11.81       | 0.43         | 11.38       | 69.82     | 70.22 | 62.30 | 70.51       | 70.52 | 70.30 |
|                            | OW-DETR [11]     | 0.30         | 0.43%         | 0.9979        | 12.28       | 0.48         | 11.81       | 70.21     | 70.18 | 62.00 | 70.51       | 70.52 | 70.30 |
|                            | Ours             | <b>0.17</b>  | <b>0.24%</b>  | <b>0.9988</b> | <b>6.23</b> | <b>-1.65</b> | <b>7.88</b> | 70.62     | 71.86 | 66.88 | 70.79       | 70.69 | 72.60 |

Table 11. Incremental results (%) on VOC benchmark under 15+1+1+1+1 five-step setting.

| Scenarios     | aero  | bike  | bird  | boat  | bottle | bus   | car   | cat   | chair | cow   | table | dog   | horse | mbike | person | plant | sheep | sofa  | train | tv    | mAP          | SID [31] |
|---------------|-------|-------|-------|-------|--------|-------|-------|-------|-------|-------|-------|-------|-------|-------|--------|-------|-------|-------|-------|-------|--------------|----------|
| A(1-20)       | 80.40 | 73.70 | 77.10 | 57.00 | 58.10  | 74.40 | 75.70 | 85.40 | 54.40 | 76.40 | 54.10 | 83.50 | 83.80 | 73.70 | 72.10  | 51.00 | 71.10 | 58.50 | 82.80 | 72.60 | 70.79        | 71.60    |
| A(1-15)       | 81.90 | 75.90 | 76.40 | 58.70 | 60.90  | 74.20 | 76.50 | 86.40 | 57.60 | 78.50 | 57.50 | 83.70 | 84.10 | 75.00 | 75.30  |       |       |       |       |       | 73.51        | 73.71    |
| +B(16, plant) | 83.10 | 82.60 | 79.90 | 61.10 | 60.10  | 77.50 | 80.40 | 89.00 | 61.40 | 81.40 | 68.10 | 88.10 | 86.70 | 79.80 | 80.10  | 43.60 |       |       |       |       | <b>75.18</b> | 68.00    |
| +B(17, sheep) | 82.60 | 74.30 | 69.20 | 56.90 | 60.10  | 75.50 | 76.10 | 76.30 | 58.50 | 67.70 | 63.80 | 80.80 | 79.90 | 74.90 | 78.30  | 37.90 | 47.50 |       |       |       | <b>68.25</b> | 63.00    |
| +B(18, sofa)  | 79.60 | 69.70 | 59.10 | 51.70 | 53.40  | 66.30 | 74.90 | 70.10 | 57.30 | 53.10 | 63.00 | 73.40 | 67.40 | 72.60 | 76.50  | 26.90 | 34.70 | 32.60 |       |       | <b>60.13</b> | 57.30    |
| +B(19, train) | 68.20 | 67.70 | 53.30 | 41.30 | 44.80  | 53.70 | 69.50 | 62.10 | 52.80 | 37.20 | 57.20 | 66.80 | 67.10 | 64.80 | 69.70  | 21.20 | 25.00 | 29.40 | 46.00 |       | <b>52.52</b> | 53.20    |
| +B(20, tv)    | 68.90 | 63.60 | 55.60 | 39.00 | 46.00  | 53.90 | 67.00 | 67.00 | 54.30 | 29.20 | 56.30 | 61.10 | 61.00 | 57.90 | 69.10  | 23.50 | 23.60 | 30.00 | 41.10 | 59.30 | <b>51.37</b> | 48.90    |
